# Supplementary material
Source: PubMed Central journal article supplement (PMC7021000)
Supplement: NIHMS1548655-supplement-1.pdf [file NIHMS1548655-supplement-1.pdf]

# **SUPPLEMENTARY FIGURES**

**for Naseri et al.**

**“Aggregation of Mutant Cysteine String Protein- $\alpha$  via Fe-S Cluster-Binding is mitigated by Fe-chelators”**

Recombinant protein

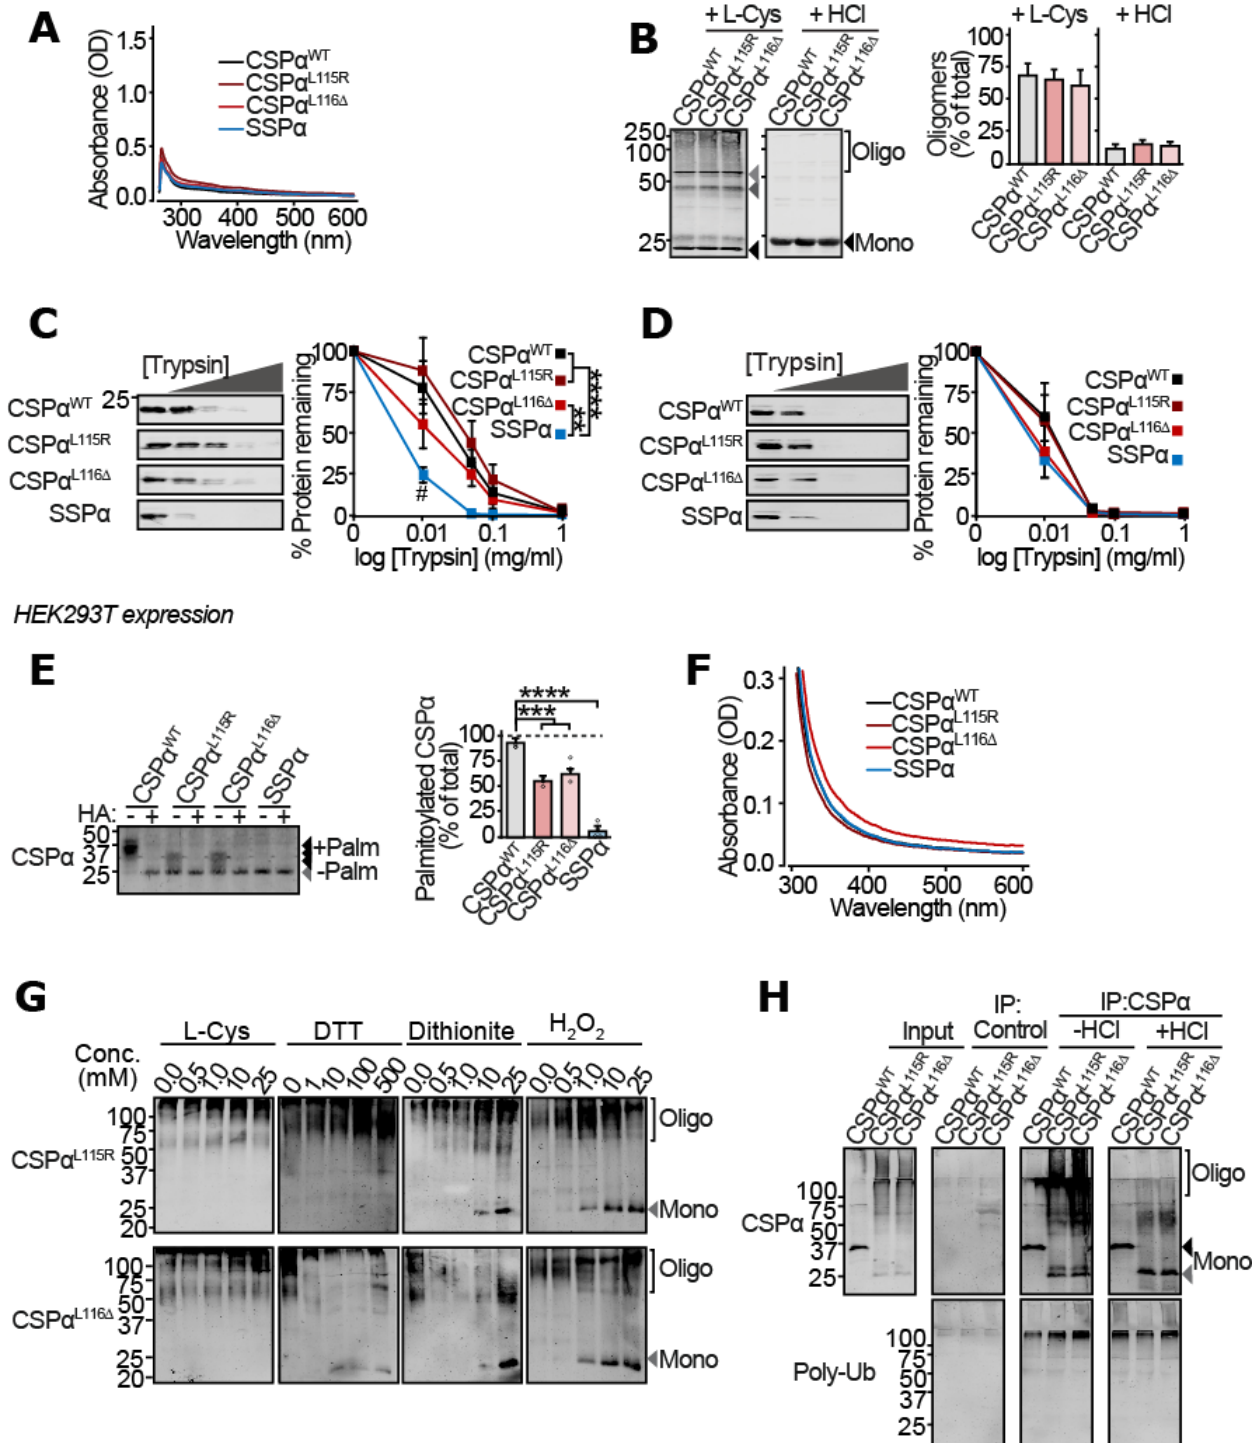

**Supplementary Figure S1 | Fe-S cluster binding and oligomerization of CSPα *in vitro* and in mammalian cells. (a-**

**d)** Purified recombinant CSPα<sup>WT</sup>, CSPα<sup>L115R</sup>, CSPα<sup>L116Δ</sup> and SSPα: (a) UV-Vis absorbance spectra of purified proteins following HCl treatment. (b) Oligomers of CSPα were measured by quantitative immunoblotting following incubation with L-cysteine (L-Cys) or HCl. Mono = monomer; Oligo = oligomers; grey arrowheads = possible dimer and tetramer. (c) Purified proteins were subjected to increasing trypsin concentrations. CSPα oligomers were then disrupted with HCl,

followed by boiling in Laemmli sample buffer and quantitative immunoblotting against CSP $\alpha$ . **(d)** Same as in **(c)** except that before trypsinization, purified proteins were incubated with HCl. **(e-h)** Myc-tagged protein expression in HEK293T cells: **(e)** HEK293T cells transfected with CSP $\alpha^{WT}$ , CSP $\alpha^{L115R}$ , CSP $\alpha^{L116\Delta}$ , or SSP $\alpha$  expressing vectors were lysed 48 h post-transfection in buffer containing HCl to disrupt any oligomerization mediated by Fe-S clusters. Neutralized lysates were treated with either Tris (-) or hydroxylamine (HA) and quantitatively immunoblotted against CSP $\alpha$ . Palm = palmitoylated. **(f)** UV-Vis absorbance spectra of immunoprecipitated proteins after HCl treatment. **(g)** Post-nuclear lysates from HEK293T cells expressing CSP $\alpha^{L115R}$  or CSP $\alpha^{L116\Delta}$  were incubated with L-cysteine, DTT, sodium dithionite or H<sub>2</sub>O<sub>2</sub> at indicated concentrations, followed by SDS-PAGE and anti-CSP $\alpha$  immunoblotting. **(h)** Ubiquitination of the indicated CSP $\alpha$  versions was measured by immunoprecipitation of myc-CSP $\alpha$  followed by immunoblotting for co-immunoprecipitated polyubiquitin, with and without HCl treatment post-immunoprecipitation. In **(b, h)**, any acid-denatured/aggregated protein was included in the loaded sample. Data are from **(a)** representative of n=3, **(b)** n=4 (L-Cys) and n=9 (HCl), **(c-d)** n=6, **(e)** n=3, **(f)** representative of n=3, **(g)** n=4. In **(a-d)** n = protein purification; in **(e-h)** n = transfection. Data represent means  $\pm$  SEM. In **(b, e)** \*\*\*P<0.001; \*\*\*\*P<0.0001 by two-tailed Student's t-test, in **(c, d)** \*\*P<0.01; \*\*\*\*P<0.0001 by two-way ANOVA excluding 1 mg/ml [trypsin], #P $\leq$ 0.05 by Tukey's multiple comparisons test.

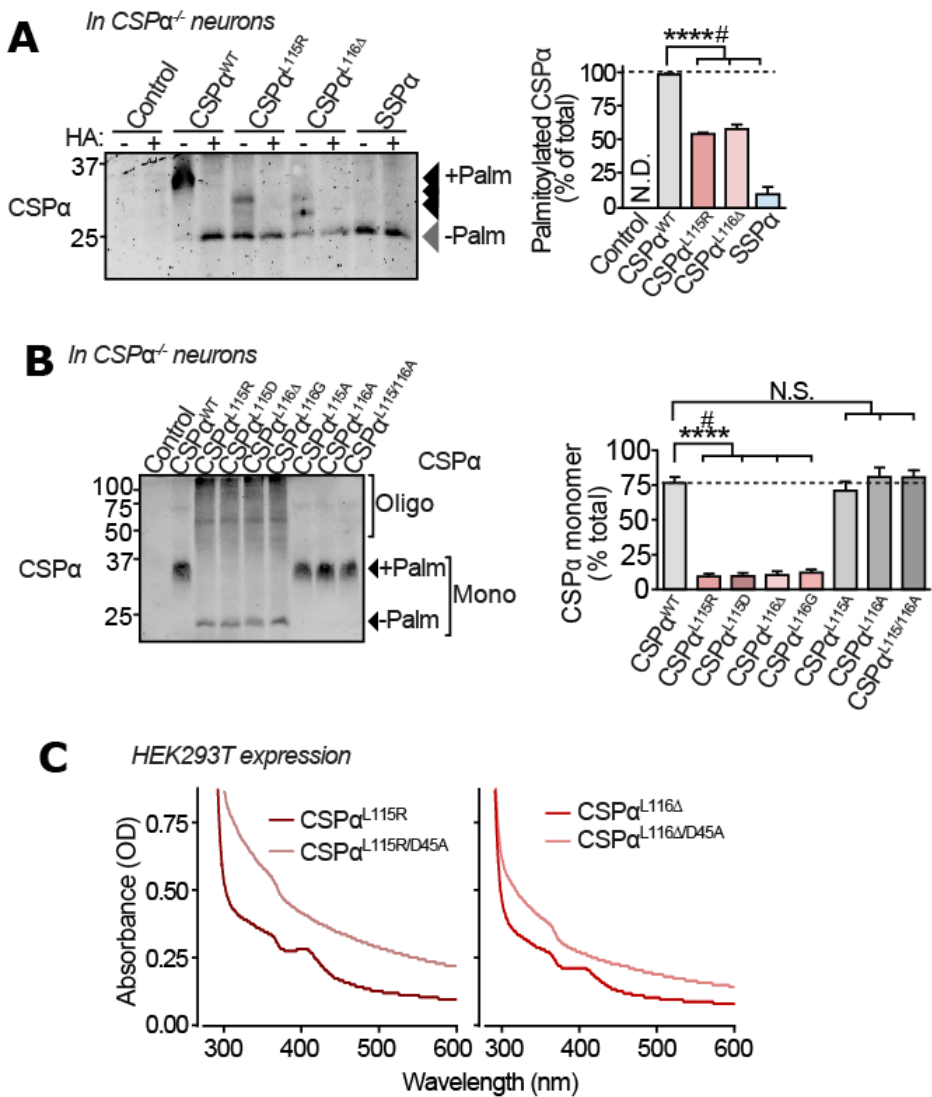

**Supplementary Figure S2 | Reduced palmitoylation and Fe-S cluster binding of ANCL-causing and artificial CSP $\alpha$  mutants.**

**(a-b)** Primary cortical neurons from neonatal CSP $\alpha$ <sup>-/-</sup> mice were lentivirally infected with indicated version of CSP $\alpha$  on 7 days *in vitro* (DIV), and harvested on 15 DIV. **(a)** Neurons expressing myc-tagged CSP $\alpha$ <sup>WT</sup>, CSP $\alpha$ <sup>L115R</sup>, CSP $\alpha$ <sup>L116 $\Delta$</sup> , SSP $\alpha$ , or empty virus (control) were lysed in 0.1 N HCl containing 0.1% Triton X-100 for 20 min at 4 °C, to disrupt any oligomerization mediated by Fe-S clusters. Lysate was neutralized with 1 M sodium cacodylate to pH 7.0 and treated for 16 h with either 0.5 M Tris (-) or with 0.5 M hydroxylamine (HA) at 4 °C, followed by quantitative immunoblotting against CSP $\alpha$ . Depalmitoylation (HA) illustrates palmitoylation-dependent mass shift. **(b)** Neurons expressing myc-tagged CSP $\alpha$ <sup>WT</sup>, CSP $\alpha$ <sup>L115R</sup>, CSP $\alpha$ <sup>L115D</sup>, CSP $\alpha$ <sup>L116 $\Delta$</sup> , CSP $\alpha$ <sup>L116G</sup>, CSP $\alpha$ <sup>L115A</sup>, CSP $\alpha$ <sup>L116A</sup>, or CSP $\alpha$ <sup>L115/116A</sup> were lysed in non-reducing Laemmli sample buffer. Monomer levels of indicated CSP $\alpha$  variants were measured by SDS-PAGE separation and quantitative immunoblotting. Representative immunoblot (left), and quantitation (right) as % of the total protein detected in corresponding lane. Mono = monomer; Oligo = oligomers; Palm = palmitoylated. **(c)** From

HEK293T cells expressing myc-tagged CSP $\alpha$ <sup>L115R</sup>, CSP $\alpha$ <sup>L115R/D45A</sup>, CSP $\alpha$ <sup>L116 $\Delta$</sup> , and CSP $\alpha$ <sup>L116 $\Delta$ /D45A</sup>. UV-Vis absorbance spectra of indicated proteins immunoprecipitated using anti-myc antibody and eluted by trypsinization. Data are from (a) n=5 transductions, (b) n=4 transductions, and (c) representative spectra from n=3 independent CSP $\alpha$  immunoprecipitations. In (a-b) data represent means  $\pm$  SEM. \*\*\*\*P<0.0001; N.S. = not significant by two-tailed Student's t-test; #P<0.05 by Mann-Whitney-Wilcoxon *U* test.

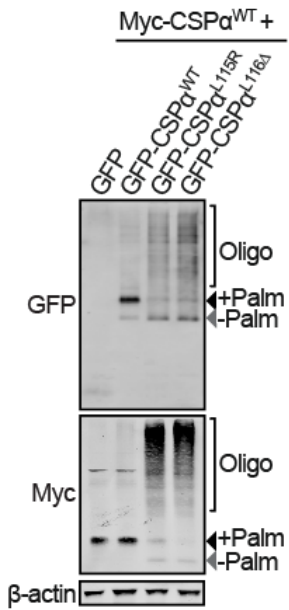

**Supplementary Figure S3 | Mutant CSP $\alpha$  draws wild type CSP $\alpha$  into aggregates.** CSP $\alpha^{-/-}$  primary cortical neurons were lentivirally transduced to co-express myc-CSP $\alpha^{WT}$  with either GFP-CSP $\alpha^{WT}$ , GFP-CSP $\alpha^{L115R}$ , or GFP-CSP $\alpha^{L116\Delta}$  (control = GFP alone). Shown is one representative experiment from n=3 independent co-transductions. Oligo = oligomerized; Palm = palmitoylated.

**A**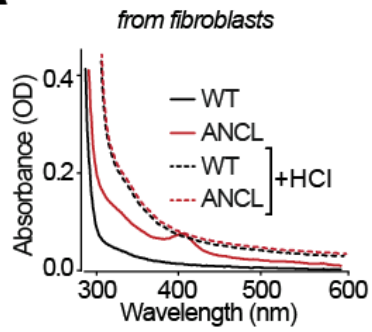**B**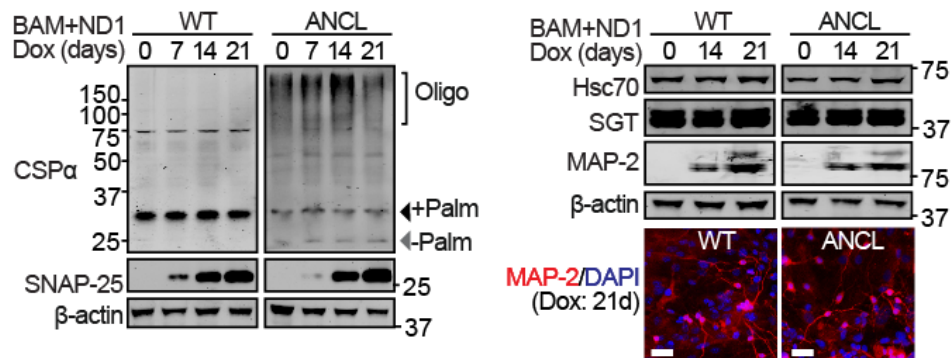**C**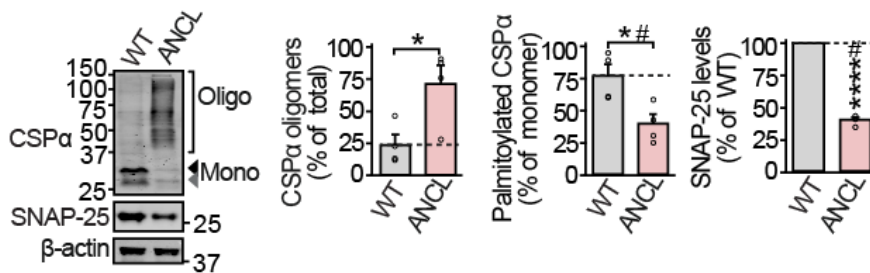**D**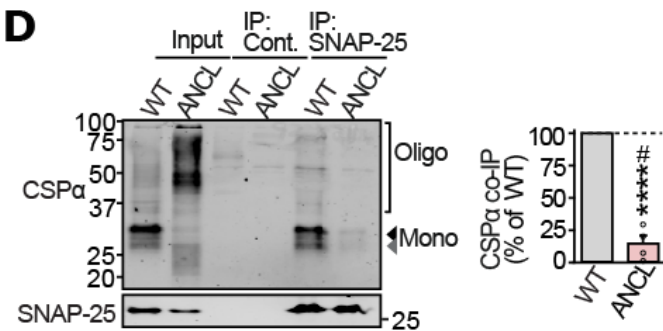

Fig. S4 Continues on next page.

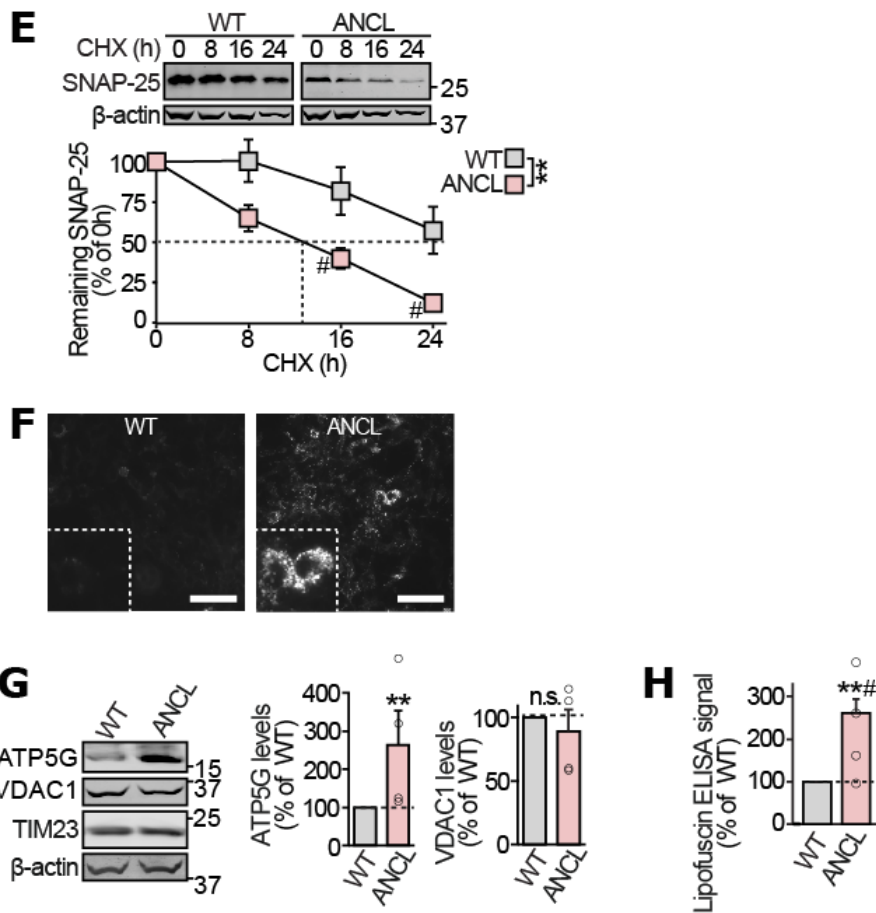

**Supplementary Figure S4 | ANCL patient-derived fibroblasts and iNs reveal CSP $\alpha$  defects with downstream SNAP-25 instability and lipofuscin accumulation.** (a) UV-Vis absorbance spectra of immunoprecipitated CSP $\alpha$  from WT and ANCL patient fibroblasts, before (solid lines) and following (dashed lines) 0.1 N HCl incubation for 20 min at R/T (dashed lines). (b) Time course of direct induction of WT and ANCL fibroblasts into iNs using BAM+ND1 expression. Immunoblots show the expression of neuronal marker MAP-2 and synaptic SNARE SNAP-25, as well as that of CSP $\alpha$  and its chaperone complex partners Hsc70 and SGT. Anti-MAP2 immunofluorescence following 21 d of induction (bottom panels). Dox = doxycycline; scale bar = 50  $\mu$ m. (c) CSP $\alpha$  oligomerization, palmitoylation and SNAP-25 levels were measured in WT and ANCL iNs by quantitative immunoblotting. (d) Interaction of CSP $\alpha$  SNAP-25 was measured in WT and ANCL iNs by immunoprecipitating SNAP-25 followed by quantitative immunoblotting of co-immunoprecipitated CSP $\alpha$  (normalized to the immunoprecipitated SNAP-25). Cont. = control sham IP without IgG. (e) Turnover of SNAP-25 was determined in WT and ANCL iNs by cycloheximide (CHX) chase followed by quantitative immunoblotting. (f-h) WT and ANCL iNs were analyzed at 56 days following BAM+ND1 induction protocol for (f) lipofuscin autofluorescence at Ex 465-495, Em 515-555 nm range (bar = 50  $\mu$ m), (g) total levels of ATP5G accumulation by quantitative immunoblotting (VDAC1 and TIM23 indicate overall mitochondrial protein expression), and (h) lipofuscin accumulation by ELISA. Data are from (a) representative of n=3 immunoprecipitations; (b) representative of n=3 iN conversions; (c) n=4 iN conversions; (d) n=4



immunoprecipitations; **(e)** n=6 for WT and n=5 for ANCL (n = iN conversions); **(f)** representative of n=3 iN conversions; **(g-h)** n=4 iN conversions. In **(c-d)** and **(g-h)** \*P<0.05; \*\*P<0.01; \*\*\*P<0.001; \*\*\*\*P<0.0001 by two-tailed Student's t-test; #P<0.05 by Mann-Whitney-Wilcoxon *U* test. In **(e)** \*\*P<0.01 by two-way ANOVA; #P<0.05 by Tukey's multiple comparisons test.
